# Supplementary material for: Introgressive hybridization in a Spiny-Tailed Iguana, Ctenosaura pectinata , and its implications for taxonomy and conservation
Source: PeerJ journal article supplement (doi:10.7717/peerj.6744), 2019-04-23

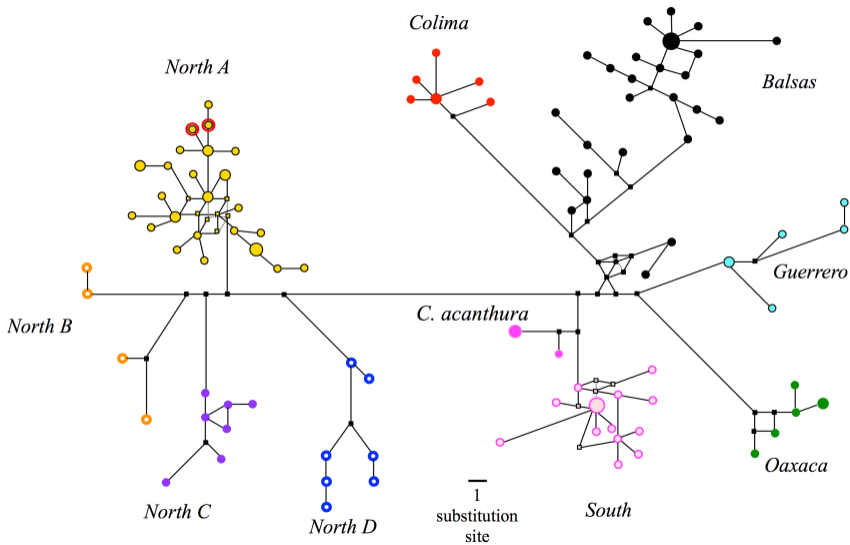

Supplement: Figure_S1_network.pdf [file Figure_S1_network.pdf]
