# Supplementary material for: Introgressive hybridization in a Spiny-Tailed Iguana, Ctenosaura pectinata, and its implications for taxonomy and conservation
Source: PeerJ. 2019 Apr 23;7:e6744. doi: 10.7717/peerj.6744 (PMC6485205; doi:10.7717/peerj.6744)
Supplement: Supplemental Information 4 [file peerj-07-6744-s004.xlsx]

## Sheet: Data
Supplemental information File S1. Table 1. Data sheet comprising mtDNA haplotypes, accession number, microsatellite alleles, data source for each individual included in this study.
Label	Locality	State	Longitude	Latitude	mtDNA Lineage	haplotype	Genbank Accesion number	Pec01 allele 1	Pec01 allele 2	Pec03 allele 1	Pec03 allele 2	Pec16 allele 1	Pec16 allele 2	Pec20 allele 1	Pec20 allele 2	Pec73 allele 1	Pec73 allele 2	Pec89 allele 1	Pec89 allele 2	Cthe12 allele 1	Cthe12 allele 2	Che37 allele 1	Che37 allele 2	mtDNA source	microsatellite source
A01	Apatzingan	Michoacan	-102.351	19.0881	Balsas	9_bal	EU246702	91	97	219	219	241	247	230	236	183	189	250	252	192	196	222	233	Zarza et al 2008	Zarza et al 2016
A03	Apatzingan	Michoacan	-102.351	19.0881	Balsas	10_bal	EU246703	91	105	223	227	222	222	230	232	183	189	250	250	196	211	226	235	Zarza et al 2008	Zarza et al 2016
A04	Apatzingan	Michoacan	-102.351	19.0881	Balsas	10_bal	EU246703	99	108	227	227	222	241	226	226	189	190	248	248	196	204	226	230	Zarza et al 2008	Zarza et al 2016
A05	Apatzingan	Michoacan	-102.351	19.0881	Balsas	10_bal	EU246703	99	103	219	219	224	243	228	228	189	190	250	250	196	217	230	230	Zarza et al 2008	Zarza et al 2016
A06	Apatzingan	Michoacan	-102.351	19.0881	Balsas	10_bal	EU246703	106	108	219	227	222	241	226	230	189	189	246	248	196	196	220	226	Zarza et al 2008	Zarza et al 2016
A11	Apatzingan	Michoacan	-102.351	19.0881	Balsas	10_bal	EU246703	91	103	219	219	222	222	228	228	183	189	250	263	196	213	212	235	Zarza et al 2008	Zarza et al 2016
A12	Apatzingan	Michoacan	-102.351	19.0881	Balsas	10_bal	EU246703	99	106	219	227	222	241	234	234	189	189	250	252	213	213	212	226	Zarza et al 2008	Zarza et al 2016
A13	Apatzingan	Michoacan	-102.351	19.0881	Balsas	10_bal	EU246703	103	108	219	227	222	247	228	234	189	190	250	250	196	-9	226	230	Zarza et al 2008	Zarza et al 2016
A14	Apatzingan	Michoacan	-102.351	19.0881	Balsas	10_bal	EU246703	103	106	219	227	222	222	228	228	183	189	246	248	196	217	230	230	Zarza et al 2008	Zarza et al 2016
CTa01	Caleta de Campos	Michoacan	-102.756	18.0733	Balsas	27_bal	EU246720	91	101	221	223	212	222	228	230	189	189	250	250	196	198	222	230	Zarza et al 2008	Zarza et al 2016
CTa02	Caleta de Campos	Michoacan	-102.756	18.0733	Balsas	26_bal	EU246719	91	91	219	219	224	227	228	230	189	189	250	250	198	198	228	228	Zarza et al 2008	Zarza et al 2016
CTa03	Caleta de Campos	Michoacan	-102.756	18.0733	Balsas	27_bal	EU246720	91	103	219	223	212	220	228	230	189	189	246	252	196	198	228	235	Zarza et al 2008	Zarza et al 2016
CY03	El Cayaco	Guerrero	-100.268	17.0461	Balsas	30_bal	EU246723	91	91	219	219	212	218	228	232	189	189	250	250	-9	-9	228	228	Zarza et al 2008	Zarza et al 2016
IZ01	Izucar de Matamoros	Puebla	-98.465	18.6008	Balsas	45_bal	EU246737	91	95	215	219	227	-9	226	228	189	189	248	250	196	196	230	235	Zarza et al 2008	Zarza et al 2016
IZ02	Izucar de Matamoros	Puebla	-98.465	18.6008	Balsas	45_bal	EU246737	97	99	219	219	227	-9	230	234	189	189	248	250	196	196	230	230	Zarza et al 2008	Zarza et al 2016
IZ03	Izucar de Matamoros	Puebla	-98.465	18.6008	Balsas	45_bal	EU246737	91	97	219	219	212	212	230	234	189	189	248	254	198	198	228	230	Zarza et al 2008	Zarza et al 2016
JE01	San Jeronimo	Puebla	-97.9142	18.2208	Balsas	46_bal	EU246738	91	99	215	219	212	237	226	226	189	189	248	248	196	198	222	230	Zarza et al 2008	Zarza et al 2016
JE02	San Jeronimo	Puebla	-97.9142	18.2208	Balsas	46_bal	EU246738	91	95	215	219	212	212	226	226	189	189	252	254	196	196	228	228	Zarza et al 2008	Zarza et al 2016
JE03	San Jeronimo	Puebla	-97.9142	18.2208	Balsas	78_bal	EU246769	91	95	219	219	212	231	226	228	189	189	248	252	196	196	230	230	Zarza et al 2008	Zarza et al 2016
OS01	Ostula	Michoacan	-103.477	18.5046	Balsas	58_col	EU246750	91	108	219	223	226	231	228	230	189	189	252	252	198	198	226	230	Zarza et al 2011	Zarza et al 2011
OS02	Ostula	Michoacan	-103.477	18.5046	Balsas	59_col	EU246751	91	108	215	219	222	222	226	230	189	189	250	250	198	211	220	222	Zarza et al 2011	Zarza et al 2011
OS03	Ostula	Michoacan	-103.477	18.5046	Balsas	59_col	EU246751	91	101	217	219	220	224	230	230	189	189	246	250	198	207	220	230	Zarza et al 2011	Zarza et al 2011
OS04	Ostula	Michoacan	-103.52	18.4748	Balsas	59_col	EU246751	91	101	219	219	224	229	226	230	189	189	246	252	198	198	226	235	Zarza et al 2011	Zarza et al 2011
OS05	Ostula	Michoacan	-103.52	18.4748	Balsas	59_col	EU246751	91	101	219	223	212	222	224	230	189	189	250	254	204	204	228	230	Zarza et al 2011	Zarza et al 2011
OS06	Ostula	Michoacan	-103.53	18.4804	Balsas	59_col	EU246751	93	105	219	219	222	227	232	234	189	189	252	254	198	198	228	230	Zarza et al 2011	Zarza et al 2011
OS07	Ostula	Michoacan	-103.531	18.4771	Balsas	59_col	EU246751	91	91	219	219	227	231	226	232	189	189	252	252	194	198	222	226	Zarza et al 2011	Zarza et al 2011
OS08	Ostula	Michoacan	-103.531	18.4771	Balsas	59_col	EU246751	95	110	219	219	212	231	230	230	189	189	250	252	194	202	222	235	Zarza et al 2011	Zarza et al 2011
OS09	Ostula	Michoacan	-103.531	18.4771	Balsas	59_col	EU246751	91	95	219	219	220	226	230	232	189	189	250	250	192	194	222	222	Zarza et al 2011	Zarza et al 2011
PLA01	La Placita	Michoacan	-103.601	18.5952	Balsas	59_col	EU246751	91	97	219	219	212	224	226	234	189	189	246	246	198	200	230	235	Zarza et al 2011	Zarza et al 2011
PLA02	La Placita	Michoacan	-103.601	18.5952	Balsas	59_col	EU246751	97	101	219	219	229	235	226	230	189	189	254	263	192	198	220	233	Zarza et al 2011	Zarza et al 2011
PLA03	La Placita	Michoacan	-103.589	18.5289	Balsas	59_col	EU246751	91	105	219	219	227	229	230	236	189	189	250	250	198	198	220	230	Zarza et al 2011	Zarza et al 2011
PLA04	La Placita	Michoacan	-103.589	18.5278	Balsas	59_col	EU246751	91	95	215	219	212	227	230	230	189	189	250	250	194	211	222	230	Zarza et al 2011	Zarza et al 2011
PLA05	La Placita	Michoacan	-103.588	18.5287	Balsas	59_col	EU246751	97	101	219	219	227	227	230	230	189	189	250	250	198	198	220	230	Zarza et al 2011	Zarza et al 2011
PLA06	La Placita	Michoacan	-103.585	18.5353	Balsas	59_col	EU246751	95	108	219	223	227	227	228	230	189	189	246	248	194	196	220	222	Zarza et al 2011	Zarza et al 2011
PLA07	La Placita	Michoacan	-103.593	18.5311	Balsas	59_col	EU246751	103	108	219	223	220	229	228	230	189	189	252	252	200	206	220	222	Zarza et al 2011	Zarza et al 2011
PLA08	La Placita	Michoacan	-103.594	18.5308	Balsas	59_col	EU246751	91	110	219	219	224	227	230	234	186	189	250	250	194	196	222	230	Zarza et al 2011	Zarza et al 2011
PLA09	La Placita	Michoacan	-103.595	18.5693	Balsas	H90	FJ715723	91	101	219	223	218	241	230	232	189	189	252	252	194	196	230	233	Zarza et al 2011	Zarza et al 2011
S01	Valle Luz	Guerrero	-100.339	18.1283	Balsas	78_bal	EU246769	91	91	215	219	222	235	226	226	186	189	250	250	196	198	228	228	Zarza et al 2008	Zarza et al 2016
S02	Valle Luz	Guerrero	-100.339	18.1283	Balsas	78_bal	EU246769	91	91	219	219	212	233	228	228	186	186	250	250	196	198	222	228	Zarza et al 2008	Zarza et al 2016
S03	Valle Luz	Guerrero	-100.339	18.1283	Balsas	78_bal	EU246769	91	91	219	219	212	222	222	228	186	189	246	254	196	-9	230	235	Zarza et al 2008	Zarza et al 2016
S04	Valle Luz	Guerrero	-100.339	18.1283	Balsas	78_bal	EU246769	91	95	219	219	226	235	228	230	189	189	252	254	196	196	222	228	Zarza et al 2008	Zarza et al 2016
S05	Valle Luz	Guerrero	-100.339	18.1283	Balsas	78_bal	EU246769	91	99	219	219	222	233	222	228	186	189	244	248	196	196	228	239	Zarza et al 2008	Zarza et al 2016
S06	Valle Luz	Guerrero	-100.339	18.1283	Balsas	78_bal	EU246769	91	99	219	219	222	233	228	230	186	189	248	250	198	198	226	230	Zarza et al 2008	Zarza et al 2016
S07	Valle Luz	Guerrero	-100.339	18.1283	Balsas	78_bal	EU246769	91	99	219	219	212	231	230	230	189	189	250	256	196	196	222	228	Zarza et al 2008	Zarza et al 2016
S08	Valle Luz	Guerrero	-100.339	18.1283	Balsas	78_bal	EU246769	99	99	215	219	222	222	226	230	189	189	250	250	196	196	226	230	Zarza et al 2008	Zarza et al 2016
S09	Valle Luz	Guerrero	-100.339	18.1283	Balsas	78_bal	EU246769	95	103	219	219	212	222	228	230	189	189	250	250	196	198	226	228	Zarza et al 2008	Zarza et al 2016
S10	Valle Luz	Guerrero	-100.339	18.1283	Balsas	78_bal	EU246769	95	95	215	219	222	222	222	230	189	189	250	250	196	198	228	230	Zarza et al 2008	Zarza et al 2016
SJ01	San Jeronimo	Guerrero	-101.342	17.5736	Balsas	74_bal	EU246765	91	91	219	219	212	218	226	230	189	189	244	250	198	198	228	228	Zarza et al 2008	Zarza et al 2016
SJ02	San Jeronimo, Aeropuerto	Guerrero	-101.46	17.6214	Balsas	75_bal	EU246766	91	103	219	223	235	239	226	226	189	189	250	250	196	198	228	228	Zarza et al 2008	Zarza et al 2016
SL01	San Luis de la Loma	Guerrero	-100.89	17.2681	Balsas	76_bal	EU246767	91	99	219	219	229	237	226	228	189	189	250	250	196	198	218	230	Zarza et al 2008	Zarza et al 2016
SL02	San Luis de la Loma	Guerrero	-100.89	17.2681	Balsas	77_bal	EU246768	91	93	219	219	235	243	226	226	189	189	240	246	194	198	216	228	Zarza et al 2008	Zarza et al 2016
SL03	San Luis de la Loma	Guerrero	-100.89	17.2681	Balsas	77_bal	EU246768	93	99	219	219	212	243	222	226	189	189	250	250	196	198	216	233	Zarza et al 2008	Zarza et al 2016
T01	Teacalco	Morelos	-99.4525	18.6175	Balsas	78_bal	EU246769	91	108	219	219	212	264	228	234	186	189	250	250	196	196	226	228	Zarza et al 2008	Zarza et al 2016
T03	Teacalco	Morelos	-99.4525	18.6175	Balsas	78_bal	EU246769	91	91	219	219	218	235	226	230	189	189	246	248	198	198	226	228	Zarza et al 2008	Zarza et al 2016
T05	Teacalco	Morelos	-99.4525	18.6175	Balsas	78_bal	EU246769	91	110	219	219	237	259	226	228	189	189	246	250	196	200	226	228	Zarza et al 2008	Zarza et al 2016
T06	Teacalco	Morelos	-99.4525	18.6175	Balsas	78_bal	EU246769	91	95	215	219	218	233	228	230	189	189	248	250	196	196	226	228	Zarza et al 2008	Zarza et al 2016
T07	Teacalco	Morelos	-99.4525	18.6175	Balsas	78_bal	EU246769	95	95	215	219	212	264	228	230	189	189	246	250	196	196	226	228	Zarza et al 2008	Zarza et al 2016
T08	Teacalco	Morelos	-99.4525	18.6175	Balsas	78_bal	EU246769	99	108	219	219	212	262	230	230	186	186	250	252	198	198	226	235	Zarza et al 2008	Zarza et al 2016
T09	Teacalco	Morelos	-99.4525	18.6175	Balsas	78_bal	EU246769	95	110	219	219	259	262	230	230	189	189	246	250	196	196	226	228	Zarza et al 2008	Zarza et al 2016
T10	Teacalco	Morelos	-99.4525	18.6175	Balsas	78_bal	EU246769	91	91	219	219	212	262	228	234	189	189	246	250	196	200	226	230	Zarza et al 2008	Zarza et al 2016
T11	Teacalco	Morelos	-99.4525	18.6175	Balsas	78_bal	EU246769	91	105	219	219	235	262	226	230	186	189	250	250	196	196	224	230	Zarza et al 2008	Zarza et al 2016
TCM	Tlapa de Comonfort	Guerrero	-98.5764	17.5461	Balsas	78_bal	EU246769	91	99	219	219	212	-9	226	230	189	189	248	254	196	196	230	230	Zarza et al 2008	Zarza et al 2016
TIC01	Ticuiz	Michoacan	-103.685	18.6639	Balsas	59_col	EU246751	91	97	215	219	212	229	230	234	189	189	250	250	194	196	222	226	Zarza et al 2011	Zarza et al 2011
TIC02	Ticuiz	Michoacan	-103.685	18.6639	Balsas	59_col	EU246751	91	101	215	219	226	229	230	230	189	189	250	263	194	198	220	222	Zarza et al 2011	Zarza et al 2011
TIC03	Ticuiz	Michoacan	-103.682	18.665	Balsas	59_col	EU246751	95	101	219	219	227	231	228	234	189	189	250	252	194	198	228	235	Zarza et al 2011	Zarza et al 2011
TIC05	Ticuiz	Michoacan	-103.685	18.6639	Balsas	H91	FJ715724	91	91	219	219	229	239	228	230	186	189	250	250	194	206	224	228	Zarza et al 2011	Zarza et al 2011
TIC06	Ticuiz	Michoacan	-103.688	18.6617	Balsas	59_col	EU246751	97	105	219	227	231	241	230	232	186	189	246	250	206	211	230	239	Zarza et al 2011	Zarza et al 2011
TIC07	Ticuiz	Michoacan	-103.688	18.6617	Balsas	59_col	EU246751	93	103	215	219	222	231	228	234	189	189	250	254	194	198	220	220	Zarza et al 2011	Zarza et al 2011
TZ01	Tizupa	Michoacan	-103.128	18.225	Balsas	79_bal	EU246770	91	105	219	221	222	222	228	230	189	189	254	254	194	211	222	228	Zarza et al 2011	Zarza et al 2011
TZ02	Tizupa	Michoacan	-103.128	18.225	Balsas	80_bal	EU246771	91	91	219	223	212	227	226	230	189	189	246	254	196	198	224	235	Zarza et al 2011	Zarza et al 2011
U02	La Paz, Union	Guerrero	-101.843	17.9531	Balsas	82_bal	EU246773	91	103	219	227	218	222	222	228	189	190	248	250	196	196	222	230	Zarza et al 2008	Zarza et al 2016
U03	La Paz, Union	Guerrero	-101.843	17.9531	Balsas	78_bal	EU246769	99	106	219	219	222	233	226	230	189	189	250	254	196	202	224	228	Zarza et al 2008	Zarza et al 2016
U04	La Paz, Union	Guerrero	-101.843	17.9531	Balsas	81_bal	EU246772	99	106	219	223	212	222	228	232	189	189	246	250	196	196	226	230	Zarza et al 2008	Zarza et al 2016
U05	La Paz, Union	Guerrero	-101.843	17.9531	Balsas	78_bal	EU246769	99	105	219	219	222	243	228	230	189	189	250	250	196	-9	220	224	Zarza et al 2008	Zarza et al 2016
U06	La Paz, Union	Guerrero	-101.843	17.9531	Balsas	82_bal	EU246773	91	112	219	223	233	233	228	228	189	189	250	250	196	221	230	230	Zarza et al 2008	Zarza et al 2016
U07	La Paz, Union	Guerrero	-101.843	17.9531	Balsas	82_bal	EU246773	103	106	219	219	222	222	230	236	189	189	246	250	196	198	220	230	Zarza et al 2008	Zarza et al 2016
U08	La Paz, Union	Guerrero	-101.843	17.9531	Balsas	81_bal	EU246772	93	112	219	219	218	233	222	230	189	189	250	250	196	198	226	228	Zarza et al 2008	Zarza et al 2016
U09	La Paz, Union	Guerrero	-101.843	17.9531	Balsas	83_bal	EU246774	91	106	215	219	220	222	222	228	189	189	250	250	196	198	218	228	Zarza et al 2008	Zarza et al 2016
U10	La Paz, Union	Guerrero	-101.843	17.9531	Balsas	81_bal	EU246772	91	91	219	221	218	222	226	228	189	189	250	250	196	198	230	235	Zarza et al 2008	Zarza et al 2016
U11	La Paz, Union	Guerrero	-101.843	17.9531	Balsas	81_bal	EU246772	91	99	219	223	212	235	226	228	189	189	250	250	196	196	228	237	Zarza et al 2008	Zarza et al 2016
BN01	Barra de Navidad	Jalisco	-104.683	19.2042	Colima	7_col	EU246700	97	101	219	219	229	235	226	226	188	189	250	254	200	200	230	230	Zarza et al 2011	Zarza et al 2011
BN03	Barra de Navidad	Jalisco	-104.683	19.2042	Colima	13_col	EU246706	97	99	215	219	224	224	226	226	186	189	252	254	194	196	212	224	Zarza et al 2011	Zarza et al 2011
BN07	Barra de Navidad	Jalisco	-104.674	19.2108	Colima	7_col	EU246700	101	110	219	219	224	224	226	228	186	189	254	254	190	194	220	230	Zarza et al 2011	Zarza et al 2011
BN09	Barra de Navidad	Jalisco	-104.675	19.2082	Colima	7_col	EU246700	99	108	219	219	220	220	230	232	186	189	250	254	194	194	230	230	Zarza et al 2011	Zarza et al 2011
CDO01	Cerro de Ortega	Colima	-103.721	18.7524	Colima	H93	FJ715726	95	103	219	223	220	226	228	230	189	189	250	250	194	194	226	235	Zarza et al 2011	Zarza et al 2011
CDO02	Cerro de Ortega	Colima	-103.721	18.7524	Colima	H93	FJ715726	91	105	219	223	222	229	234	234	189	189	250	250	192	206	228	230	Zarza et al 2011	Zarza et al 2011
CDO03	Cerro de Ortega	Colima	-103.72	18.8024	Colima	H92	FJ715725	105	105	219	219	227	243	232	234	184	186	250	250	194	194	220	233	Zarza et al 2011	Zarza et al 2011
CDO04	Cerro de Ortega	Colima	-103.72	18.8024	Colima	H93	FJ715726	105	105	219	219	226	243	226	232	184	189	250	250	206	206	228	233	Zarza et al 2011	Zarza et al 2011
CDO05	Cerro de Ortega	Colima	-103.72	18.8024	Colima	H93	FJ715726	91	103	219	219	218	222	230	230	184	189	250	250	196	196	228	228	Zarza et al 2011	Zarza et al 2011
CDO06	Cerro de Ortega	Colima	-103.72	18.8024	Colima	7_col	EU246700	91	99	219	219	226	243	230	230	189	189	250	254	198	198	228	230	Zarza et al 2011	Zarza et al 2011
CDO07	Cerro de Ortega	Colima	-103.72	18.8024	Colima	H93	FJ715726	91	101	219	219	226	235	230	230	189	189	250	263	198	204	220	228	Zarza et al 2011	Zarza et al 2011
CDO08	Cerro de Ortega	Colima	-103.72	18.8024	Colima	7_col	EU246700	105	110	223	227	226	235	230	230	186	186	250	263	198	198	222	233	Zarza et al 2011	Zarza et al 2011
CDO09	Cerro de Ortega	Colima	-103.72	18.8024	Colima	H93	FJ715726	91	97	219	219	212	222	230	234	189	189	250	250	196	196	222	235	Zarza et al 2011	Zarza et al 2011
CDO10	Cerro de Ortega	Colima	-103.72	18.8024	Colima	H93	FJ715726	95	106	219	223	224	243	226	230	189	189	263	263	194	206	222	222	Zarza et al 2011	Zarza et al 2011
COL02	El Colomo	Colima	-104.26	19.06	Colima	7_col	EU246700	91	101	219	219	220	220	228	232	186	188	263	263	190	194	222	222	Zarza et al 2008	Zarza et al 2011
COL03	El Colomo	Colima	-104.26	19.06	Colima	7_col	EU246700	91	97	219	219	220	222	226	230	186	186	250	263	194	196	230	233	Zarza et al 2008	Zarza et al 2011
COL04	El Colomo	Colima	-104.266	19.0576	Colima	7_col	EU246700	99	99	215	223	220	222	230	234	188	189	250	260	194	198	228	235	Zarza et al 2011	Zarza et al 2011
COL05	El Colomo	Colima	-104.266	19.0562	Colima	7_col	EU246700	91	97	215	219	227	243	226	230	188	189	250	252	192	194	224	239	Zarza et al 2011	Zarza et al 2011
COL06	El Colomo	Colima	-104.259	19.0584	Colima	7_col	EU246700	101	103	219	219	220	227	226	230	186	189	248	265	196	198	230	230	Zarza et al 2011	Zarza et al 2011
COL07	El Colomo	Colima	-104.242	19.0513	Colima	7_col	EU246700	95	101	219	219	220	243	226	230	186	186	250	250	194	194	224	228	Zarza et al 2011	Zarza et al 2011
COL08	El Colomo	Colima	-104.234	19.0522	Colima	7_col	EU246700	91	91	219	219	220	233	226	226	186	186	250	260	192	194	228	230	Zarza et al 2011	Zarza et al 2011
CTL01	Cuyutlan	Colima	-104.067	18.9173	Colima	7_col	EU246700	99	106	219	219	224	233	230	232	186	189	250	250	194	196	222	228	Zarza et al 2011	Zarza et al 2011
CTL02	Cuyutlan	Colima	-104.067	18.9173	Colima	7_col	EU246700	91	91	219	223	222	231	230	232	189	189	246	250	196	198	222	230	Zarza et al 2011	Zarza et al 2011
CTL03	Cuyutlan	Colima	-104.067	18.9173	Colima	7_col	EU246700	95	103	219	219	227	239	230	230	186	189	250	263	192	196	226	230	Zarza et al 2011	Zarza et al 2011
CTL04	Cuyutlan	Colima	-104.069	18.9179	Colima	7_col	EU246700	95	103	219	219	220	224	226	230	189	190	250	250	196	196	226	228	Zarza et al 2011	Zarza et al 2011
CTL05	Cuyutlan	Colima	-104.069	18.9181	Colima	8_col	EU246701	99	99	227	227	222	229	230	232	184	190	248	250	198	198	226	230	Zarza et al 2011	Zarza et al 2011
CTL06	Cuyutlan	Colima	-104.069	18.9181	Colima	8_col	EU246701	99	99	219	227	222	226	230	232	189	190	250	250	194	194	230	235	Zarza et al 2011	Zarza et al 2011
CTL07	Cuyutlan	Colima	-104.071	18.9192	Colima	7_col	EU246700	91	99	219	219	222	224	230	230	189	189	252	263	192	192	230	230	Zarza et al 2011	Zarza et al 2011
CTL08	Cuyutlan	Colima	-104.064	18.9178	Colima	7_col	EU246700	91	97	219	223	222	224	222	232	189	189	248	248	196	204	230	230	Zarza et al 2008	Zarza et al 2011
EZP01	Emiliano Zapata	Jalisco	-104.715	19.2419	Colima	7_col	EU246700	97	99	219	219	231	231	230	232	186	189	250	267	194	194	230	233	Zarza et al 2011	Zarza et al 2011
EZP02	Emiliano Zapata	Jalisco	-104.722	19.2452	Colima	13_col	EU246706	97	105	215	219	220	220	232	232	186	186	246	252	192	200	230	230	Zarza et al 2011	Zarza et al 2011
EZP03	Emiliano Zapata	Jalisco	-104.717	19.2465	Colima	13_col	EU246706	91	101	219	219	220	233	226	226	186	186	250	250	194	196	224	233	Zarza et al 2011	Zarza et al 2011
EZP04	Emiliano Zapata	Jalisco	-104.718	19.2466	Colima	13_col	EU246706	97	101	215	219	218	231	226	232	189	189	246	250	190	194	212	233	Zarza et al 2011	Zarza et al 2011
EZP06	Emiliano Zapata	Jalisco	-104.717	19.2465	Colima	7_col	EU246700	101	106	219	219	220	220	226	226	186	186	246	246	194	194	230	230	Zarza et al 2011	Zarza et al 2011
EZP09	Emiliano Zapata	Jalisco	-104.718	19.2467	Colima	13_col	EU246706	91	105	219	219	220	235	226	226	186	189	256	256	190	200	220	230	Zarza et al 2011	Zarza et al 2011
H03	El Ahijadero	Colima	-103.821	18.7617	Colima	7_col	EU246700	97	105	223	223	235	243	230	234	189	189	250	250	192	198	235	235	Zarza et al 2008	Zarza et al 2011
H04	El Ahijadero	Colima	-103.821	18.7617	Colima	8_col	EU246701	91	99	219	219	226	243	230	234	189	190	263	263	194	206	220	228	Zarza et al 2008	Zarza et al 2011
H05	El Ahijadero	Colima	-103.821	18.7617	Colima	7_col	EU246700	91	101	219	223	229	233	230	230	189	189	250	250	196	211	220	235	Zarza et al 2008	Zarza et al 2011
H06	El Ahijadero	Colima	-103.821	18.7617	Colima	8_col	EU246701	95	106	219	219	226	231	232	236	189	189	250	250	192	192	220	222	Zarza et al 2008	Zarza et al 2011
H07	El Ahijadero	Colima	-103.821	18.7617	Colima	8_col	EU246701	91	97	219	223	220	222	232	234	189	189	254	263	192	204	222	228	Zarza et al 2008	Zarza et al 2011
H08	El Ahijadero	Colima	-103.821	18.7617	Colima	8_col	EU246701	93	99	219	219	222	226	234	236	189	189	250	250	200	204	220	239	Zarza et al 2008	Zarza et al 2011
H09	El Ahijadero	Colima	-103.821	18.7617	Colima	8_col	EU246701	105	105	219	219	222	226	226	232	189	190	248	248	-9	206	220	228	Zarza et al 2008	Zarza et al 2011
H10	El Ahijadero	Colima	-103.821	18.7617	Colima	8_col	EU246701	91	101	219	223	222	229	232	234	189	189	254	256	194	-9	220	235	Zarza et al 2008	Zarza et al 2011
H11	El Ahijadero	Colima	-103.821	18.7617	Colima	8_col	EU246701	91	91	221	223	220	220	230	232	186	189	248	254	198	206	226	230	Zarza et al 2008	Zarza et al 2011
MAZ01	La Manzanilla	Jalisco	-104.785	19.2891	Colima	13_col	EU246706	99	106	215	219	218	237	226	226	189	189	248	252	192	192	224	230	Zarza et al 2011	Zarza et al 2011
MAZ04	La Manzanilla	Jalisco	-104.785	19.285	Colima	13_col	EU246706	99	105	215	215	233	237	226	226	186	186	248	256	194	194	212	233	Zarza et al 2011	Zarza et al 2011
MAZ05	La Manzanilla	Jalisco	-104.786	19.2856	Colima	7_col	EU246700	91	99	215	219	229	231	224	226	186	186	248	248	192	194	224	230	Zarza et al 2011	Zarza et al 2011
MAZ06	La Manzanilla	Jalisco	-104.786	19.2856	Colima	7_col	EU246700	101	105	215	219	220	237	226	226	186	188	246	248	192	194	222	230	Zarza et al 2011	Zarza et al 2011
MAZ07	La Manzanilla	Jalisco	-104.786	19.2856	Colima	13_col	EU246706	95	105	219	219	220	220	226	226	186	188	248	265	194	194	230	230	Zarza et al 2011	Zarza et al 2011
MAZ09	La Manzanilla	Jalisco	-104.786	19.2838	Colima	13_col	EU246706	103	108	215	219	220	235	226	230	186	189	248	263	192	194	216	233	Zarza et al 2011	Zarza et al 2011
NJO01	El Naranjo	Colima	-104.39	19.1286	Colima	7_col	EU246700	97	99	219	221	222	231	226	230	186	186	250	250	194	198	220	224	Zarza et al 2011	Zarza et al 2011
NJO02	El Naranjo	Colima	-104.391	19.128	Colima	7_col	EU246700	91	97	219	219	220	220	226	232	186	189	260	263	198	198	212	230	Zarza et al 2011	Zarza et al 2011
NJO03	El Naranjo	Colima	-104.391	19.1421	Colima	7_col	EU246700	91	101	219	219	220	233	226	232	186	189	250	260	192	194	224	230	Zarza et al 2011	Zarza et al 2011
NJO04	El Naranjo	Colima	-104.415	19.1297	Colima	7_col	EU246700	93	101	215	219	220	231	226	226	186	189	252	254	196	206	224	230	Zarza et al 2011	Zarza et al 2011
NJO05	El Naranjo	Colima	-104.414	19.1267	Colima	7_col	EU246700	97	103	215	219	224	233	226	236	186	186	254	254	196	198	220	224	Zarza et al 2011	Zarza et al 2011
NJO06	El Naranjo	Colima	-104.413	19.1263	Colima	7_col	EU246700	91	91	219	223	231	231	226	232	186	186	254	263	190	192	212	222	Zarza et al 2011	Zarza et al 2011
NJO07	El Naranjo	Colima	-104.411	19.127	Colima	7_col	EU246700	101	114	219	219	220	224	226	232	186	189	250	254	192	194	220	230	Zarza et al 2011	Zarza et al 2011
NJO08	El Naranjo	Colima	-104.422	19.1319	Colima	7_col	EU246700	91	108	219	219	231	231	226	228	184	186	250	265	194	204	230	233	Zarza et al 2011	Zarza et al 2011
TIC04	Ticuiz	Michoacan	-103.685	18.6639	Colima	7_col	EU246700	95	95	223	227	222	226	232	234	189	189	250	263	198	198	226	228	Zarza et al 2011	Zarza et al 2011
TIC08	Ticuiz	Michoacan	-103.688	18.6617	Colima	H94	FJ715727	91	101	219	223	220	220	232	234	189	189	250	263	198	206	220	228	Zarza et al 2011	Zarza et al 2011
B01	Acapulco	Guerrero	-99.8978	16.8711	Guerrero	6_gue	EU246699	91	95	219	219	212	212	222	230	186	189	252	252	198	200	212	220	Zarza et al 2008	Zarza et al 2016
B02	Acapulco	Guerrero	-99.8978	16.8711	Guerrero	6_gue	EU246699	99	106	219	219	212	212	224	228	186	189	250	252	196	196	220	224	Zarza et al 2008	Zarza et al 2016
B03	Acapulco	Guerrero	-99.8978	16.8711	Guerrero	6_gue	EU246699	99	99	219	219	218	260	222	226	186	189	250	252	196	196	228	237	Zarza et al 2008	Zarza et al 2016
B05	Acapulco	Guerrero	-99.8978	16.8711	Guerrero	6_gue	EU246699	99	101	219	219	212	212	226	226	189	189	252	252	-9	-9	220	237	Zarza et al 2008	Zarza et al 2016
B06	Acapulco	Guerrero	-99.8978	16.8711	Guerrero	6_gue	EU246699	99	99	219	219	257	268	222	226	189	189	250	250	196	196	220	220	Zarza et al 2008	Zarza et al 2016
B07	Acapulco	Guerrero	-99.8978	16.8711	Guerrero	6_gue	EU246699	95	99	219	219	214	260	224	226	189	189	250	250	196	196	220	228	Zarza et al 2008	Zarza et al 2016
B09	Acapulco	Guerrero	-99.8978	16.8711	Guerrero	6_gue	EU246699	95	101	219	231	218	218	224	226	189	189	246	250	196	196	212	224	Zarza et al 2008	Zarza et al 2016
B10	Acapulco	Guerrero	-99.8978	16.8711	Guerrero	6_gue	EU246699	99	101	219	219	227	243	228	228	189	189	250	250	196	196	228	237	Zarza et al 2008	Zarza et al 2016
CG01	Cruz Grande	Guerrero	-99.125	16.7222	Guerrero	6_gue	EU246699	99	99	219	231	212	259	222	228	186	189	252	252	198	198	235	235	Zarza et al 2008	Zarza et al 2016
CG02	Cruz Grande	Guerrero	-99.125	16.7222	Guerrero	6_gue	EU246699	99	101	219	219	212	255	222	222	186	189	252	256	196	196	230	230	Zarza et al 2008	Zarza et al 2016
CG03	Cruz Grande	Guerrero	-99.125	16.7222	Guerrero	6_gue	EU246699	99	105	219	223	212	262	222	228	189	189	252	254	198	200	239	239	Zarza et al 2008	Zarza et al 2016
CY01	El Cayaco	Guerrero	-100.268	17.0461	Guerrero	28_cy	EU246721	99	103	219	219	218	239	226	228	189	189	250	256	-9	-9	224	230	Zarza et al 2008	Zarza et al 2016
CY02	El Cayaco	Guerrero	-100.268	17.0461	Guerrero	29_cy	EU246722	91	105	219	219	212	212	226	232	189	189	250	250	196	198	220	228	Zarza et al 2008	Zarza et al 2016
EV02	El Vado	Oaxaca	-96.8914	16.6017	Guerrero	35_gue	EU246728	101	101	219	223	212	212	222	222	186	189	246	248	194	194	230	235	Zarza et al 2008	Zarza et al 2016
EV03	El Vado	Oaxaca	-96.8914	16.6017	Guerrero	35_gue	EU246728	95	101	219	219	212	212	222	222	186	186	248	260	194	194	218	230	Zarza et al 2008	Zarza et al 2016
EV04	El Vado	Oaxaca	-96.8914	16.6017	Guerrero	35_gue	EU246728	99	101	219	219	212	218	222	226	182	186	246	260	198	198	230	233	Zarza et al 2008	Zarza et al 2016
LL03	San Juan de los Llanos	Oaxaca	-98.5014	16.6558	Guerrero	51_gue	EU246743	95	97	219	219	212	-9	222	228	189	189	248	254	196	196	233	235	Zarza et al 2008	Zarza et al 2016
NG01	Las Negras	Oaxaca	-97.1856	15.9458	Guerrero	52_gue	EU246744	99	99	219	219	212	212	222	222	189	189	246	254	198	198	230	233	Zarza et al 2008	Zarza et al 2016
NG02	Las Negras	Oaxaca	-97.1856	15.9458	Guerrero	52_gue	EU246744	91	99	217	219	212	212	222	222	189	189	246	256	198	198	218	230	Zarza et al 2008	Zarza et al 2016
NG03	Las Negras	Oaxaca	-97.1856	15.9458	Guerrero	52_gue	EU246744	91	108	215	219	212	212	222	228	188	189	246	254	198	198	230	230	Zarza et al 2008	Zarza et al 2016
NG04	Las Negras	Oaxaca	-97.1856	15.9458	Guerrero	53_gue	EU246745	99	99	219	219	212	218	222	222	189	189	248	252	198	198	218	230	Zarza et al 2008	Zarza et al 2016
A02	Apatzingan	Michoacan	-102.351	19.0881	N/A	N/A	N/A	97	106	223	227	220	222	230	232	189	189	248	250	204	211	230	235	N/A	Zarza et al 2016
B04	Acapulco	Guerrero	-99.8978	16.8711	N/A	N/A	N/A	91	91	219	231	222	268	226	228	189	189	250	254	196	196	220	228	N/A	Zarza et al 2016
B08	Acapulco	Guerrero	-99.8978	16.8711	N/A	N/A	N/A	95	99	219	227	251	268	226	226	189	189	250	254	-9	-9	216	228	N/A	Zarza et al 2016
BN02	Barra de Navidad	Jalisco	-104.683	19.2042	N/A	N/A	N/A	99	106	219	219	220	220	226	226	186	188	248	254	194	194	230	239	N/A	Zarza et al 2011
BP02	La Barra del Potrero	Oaxaca	-96.7625	15.7342	N/A	N/A	N/A	91	99	215	215	214	214	222	222	188	190	246	256	-9	-9	224	239	N/A	Faria 2008; Zarza et al 2016
BP04	La Barra del Potrero	Oaxaca	-96.7625	15.7342	N/A	N/A	N/A	93	99	215	219	214	218	222	222	186	188	246	246	-9	-9	233	235	N/A	Faria 2008; Zarza et al 2016
BP07	La Barra del Potrero	Oaxaca	-96.7625	15.7342	N/A	N/A	N/A	99	99	219	219	224	224	222	222	188	190	246	256	-9	-9	218	224	N/A	Faria 2008; Zarza et al 2016
COL01	El Colomo	Colima	-104.26	19.06	N/A	N/A	N/A	97	101	219	219	220	222	226	226	188	189	248	250	194	198	224	230	N/A	Zarza et al 2011
EV01	El Vado	Oaxaca	-96.8914	16.6017	N/A	N/A	N/A	101	101	219	219	212	212	226	226	189	189	254	256	198	198	218	218	N/A	Zarza et al 2016
FCO11	Francisco Villa	Jalisco	-104.968	19.385	N/A	N/A	N/A	99	101	215	219	220	220	226	226	186	188	254	254	192	192	220	230	N/A	Zarza et al 2011
For02	La Fortuna	Jalisco	-105.11	19.5972	N/A	N/A	N/A	99	101	219	219	220	220	226	226	186	189	252	254	194	196	233	235	N/A	Zarza et al 2011
For10	La Fortuna	Jalisco	-105.11	19.5972	N/A	N/A	N/A	101	101	219	219	216	237	226	232	186	194	246	248	194	196	212	233	N/A	Zarza et al 2011
H02	El Ahijadero	Colima	-103.821	18.7617	N/A	N/A	N/A	97	105	215	219	220	231	226	230	189	189	254	254	196	196	224	230	N/A	Zarza et al 2011
H12	El Ahijadero	Colima	-103.821	18.7617	N/A	N/A	N/A	105	110	219	219	222	222	226	234	186	189	254	263	196	209	222	230	N/A	Zarza et al 2011
IX08	Ixhuatan	Oaxaca	-94.4825	16.3508	N/A	N/A	N/A	95	112	223	223	212	220	222	222	186	189	248	248	-9	-9	218	230	N/A	Faria 2008; Zarza et al 2016
IX10	Ixhuatan	Oaxaca	-94.4825	16.3508	N/A	N/A	N/A	95	103	219	219	214	218	222	222	182	186	248	250	-9	-9	230	233	N/A	Faria 2008; Zarza et al 2016
LT02	San Andres Tuxtla	Veracruz	-95.2122	18.4497	N/A	N/A	N/A	91	99	231	231	231	231	222	224	182	182	261	261	-9	-9	212	212	N/A	Faria 2008; Zarza et al 2016
LT03	San Andres Tuxtla	Veracruz	-95.2122	18.4497	N/A	N/A	N/A	99	99	223	227	231	237	222	222	182	182	261	261	-9	-9	212	212	N/A	Faria 2008; Zarza et al 2016
NZ36	Nizanda	Oaxaca	-95.0153	16.6528	N/A	N/A	N/A	99	103	219	219	214	214	222	222	182	186	240	250	-9	-9	218	230	N/A	Faria et al 2010
PH04	San Pedro Huamelula	Oaxaca	-95.6653	16.025	N/A	N/A	N/A	95	99	215	215	218	218	222	222	182	189	246	246	-9	-9	230	233	N/A	Faria 2008; Zarza et al 2016
PV06	Puerto Vallarta	Jalisco	-105.231	20.6133	N/A	N/A	N/A	101	101	219	219	224	241	226	226	186	192	252	252	190	192	230	230	N/A	Zarza et al 2011
T02	Teacalco	Morelos	-99.4525	18.6175	N/A	N/A	N/A	91	95	215	219	218	262	226	234	189	189	242	250	196	198	226	230	N/A	Zarza et al 2016
T04	Teacalco	Morelos	-99.4525	18.6175	N/A	N/A	N/A	91	101	219	219	255	262	228	230	189	189	250	250	196	196	222	226	N/A	Zarza et al 2016
U01	La Paz, Union	Guerrero	-101.843	17.9531	N/A	N/A	N/A	91	103	219	219	218	222	226	228	189	189	248	250	196	198	220	230	N/A	Zarza et al 2016
CMP01	La Campana	Sinaloa	-107.576	24.9955	North A	21_nth	EU246714	99	99	219	221	214	233	226	228	190	190	252	252	206	206	218	224	Zarza Franco 2008; Haplotype discovered in other northern localities by Zarza et al 2008	Zarza Franco 2008
CMP02	La Campana	Sinaloa	-107.576	24.9955	North A	21_nth	EU246714	95	99	221	221	214	237	228	228	186	190	252	252	202	204	222	222	Zarza Franco 2008; Haplotype discovered in other northern localities by Zarza et al 2008	Zarza Franco 2008
CMP03	La Campana	Sinaloa	-107.576	24.9955	North A	21_nth	EU246714	99	99	219	221	214	233	228	228	186	188	246	252	202	206	220	226	Zarza Franco 2008; Haplotype discovered in other northern localities by Zarza et al 2008	Zarza Franco 2008
CMP06	La Campana	Sinaloa	-107.61	24.9677	North A	21_nth	EU246714	99	99	219	221	233	233	228	228	188	188	252	252	206	206	212	224	Zarza Franco 2008; Haplotype discovered in other northern localities by Zarza et al 2008	Zarza Franco 2008
CMP07	La Campana	Sinaloa	-107.576	24.9958	North A	21_nth	EU246714	95	99	219	219	233	235	228	228	188	190	252	254	204	209	226	226	Zarza Franco 2008; Haplotype discovered in other northern localities by Zarza et al 2008	Zarza Franco 2008
CMP08	La Campana	Sinaloa	-107.576	24.9958	North A	21_nth	EU246714	99	99	219	219	233	233	226	226	188	190	252	252	204	206	212	218	Zarza Franco 2008; Haplotype discovered in other northern localities by Zarza et al 2008	Zarza Franco 2008
CMP09	La Campana	Sinaloa	-107.576	24.9958	North A	21_nth	EU246714	99	99	221	221	214	233	228	228	186	186	252	252	206	206	212	212	Zarza Franco 2008; Haplotype discovered in other northern localities by Zarza et al 2008	Zarza Franco 2008
CMP10	La Campana	Sinaloa	-107.576	24.9958	North A	21_nth	EU246714	95	95	221	221	231	239	226	228	186	186	252	252	206	207	222	230	Zarza Franco 2008; Haplotype discovered in other northern localities by Zarza et al 2008	Zarza Franco 2008
KLM01	Calomato	Sinaloa	-107.655	25.0556	North A	65_nth	EU246757	99	99	219	219	233	239	226	228	186	190	252	252	202	206	212	218	Zarza Franco 2008; Haplotype discovered in other northern localities by Zarza et al 2008	Zarza Franco 2008
KLM02	Calomato	Sinaloa	-107.655	25.0556	North A	65_nth	EU246757	99	99	219	221	233	235	226	226	188	190	252	252	206	206	218	222	Zarza Franco 2008; Haplotype discovered in other northern localities by Zarza et al 2008	Zarza Franco 2008
KLM03	Calomato	Sinaloa	-107.655	25.0556	North A	104_nth	KT003209	99	99	219	219	214	233	226	228	186	190	252	252	206	209	212	212	Zarza Franco 2008; Genebank accesion released in this manuscript	Zarza Franco 2008
KLM04	Calomato	Sinaloa	-107.655	25.0556	North A	21_nth	EU246714	95	99	221	221	235	237	226	228	186	190	252	254	206	206	218	228	Zarza Franco 2008; Haplotype discovered in other northern localities by Zarza et al 2008	Zarza Franco 2008
KLM05	Calomato	Sinaloa	-107.655	25.0553	North A	65_nth	EU246757	93	95	221	221	214	214	226	226	188	190	252	252	206	206	218	218	Zarza Franco 2008; Haplotype discovered in other northern localities by Zarza et al 2008	Zarza Franco 2008
KLM06	Calomato	Sinaloa	-107.655	25.0562	North A	65_nth	EU246757	99	99	219	221	233	235	228	228	186	188	252	252	202	206	218	218	Zarza Franco 2008; Haplotype discovered in other northern localities by Zarza et al 2008	Zarza Franco 2008
KLM07	Calomato	Sinaloa	-107.655	25.0562	North A	104_nth	KT003209	99	99	219	221	233	237	226	226	186	190	252	252	202	206	222	222	Zarza Franco 2008; Genebank accesion released in this manuscript	Zarza Franco 2008
KLM08	Calomato	Sinaloa	-107.655	25.0562	North A	65_nth	EU246757	99	99	219	221	235	237	226	228	186	190	252	252	206	209	212	226	Zarza Franco 2008; Haplotype discovered in other northern localities by Zarza et al 2008	Zarza Franco 2008
KLM09	Calomato	Sinaloa	-107.655	25.0562	North A	65_nth	EU246757	95	99	219	219	214	233	226	226	186	186	252	252	202	206	212	220	Zarza Franco 2008; Haplotype discovered in other northern localities by Zarza et al 2008	Zarza Franco 2008
KM35	Km. 35, Carretera Culiacan-Mochis	Sinaloa	-107.63	25.01	North A	21_nth	EU246714	95	99	219	219	214	233	226	228	186	190	252	252	209	209	218	224	Zarza Franco 2008; Haplotype discovered in other northern localities by Zarza et al 2008	Zarza Franco 2008
LC02	Laguna Canachi	Sinaloa	-107.101	24.135	North A	31_nth	EU246724	N/A	N/A	N/A	N/A	N/A	N/A	N/A	N/A	N/A	N/A	N/A	N/A	N/A	N/A	N/A	N/A	Zarza et al 2008	N/A
LC04	Laguna Canachi	Sinaloa	-107.101	24.135	North A	19_nth	EU246712	N/A	N/A	N/A	N/A	N/A	N/A	N/A	N/A	N/A	N/A	N/A	N/A	N/A	N/A	N/A	N/A	Zarza et al 2008	N/A
LC05	Laguna Canachi	Sinaloa	-107.101	24.135	North A	19_nth	EU246712	N/A	N/A	N/A	N/A	N/A	N/A	N/A	N/A	N/A	N/A	N/A	N/A	N/A	N/A	N/A	N/A	Zarza et al 2008	N/A
LC06	Laguna Canachi	Sinaloa	-107.101	24.135	North A	19_nth	EU246712	N/A	N/A	N/A	N/A	N/A	N/A	N/A	N/A	N/A	N/A	N/A	N/A	N/A	N/A	N/A	N/A	Zarza et al 2008	N/A
LMR01	Limon de Ramos	Sinaloa	-107.514	24.9193	North A	21_nth	EU246714	95	99	219	221	235	237	226	228	186	188	252	252	204	211	212	218	Zarza Franco 2008; Haplotype discovered in other northern localities by Zarza et al 2008	Zarza Franco 2008
LMR02	Limon de Ramos	Sinaloa	-107.529	24.924	North A	105_nth	KT003210	99	101	221	221	214	231	228	228	188	190	252	252	206	206	224	224	Zarza Franco 2008; Genebank accesion released in this manuscript	Zarza Franco 2008
LMR03	Limon de Ramos	Sinaloa	-107.517	24.9155	North A	21_nth	EU246714	95	99	219	219	229	231	228	228	186	188	252	254	202	206	212	222	Zarza Franco 2008; Haplotype discovered in other northern localities by Zarza et al 2008	Zarza Franco 2008
LMR04	Limon de Ramos	Sinaloa	-107.525	24.9158	North A	105_nth	KT003210	99	99	219	221	226	233	226	228	186	190	252	252	204	207	222	224	Zarza Franco 2008; Haplotype discovered in other northern localities by Zarza et al 2008	Zarza Franco 2008
LMR05	Limon de Ramos	Sinaloa	-107.516	24.9148	North A	21_nth	EU246714	93	99	219	219	214	235	226	228	186	188	252	252	206	209	224	224	Zarza Franco 2008; Haplotype discovered in other northern localities by Zarza et al 2008	Zarza Franco 2008
LMR06	Limon de Ramos	Sinaloa	-107.527	24.9201	North A	105_nth	KT003210	99	99	219	219	237	237	226	228	188	188	252	252	202	206	212	224	Zarza Franco 2008; Genebank accesion released in this manuscript	Zarza Franco 2008
LMR07	Limon de Ramos	Sinaloa	-107.518	24.9165	North A	21_nth	EU246714	99	101	219	219	233	237	226	228	188	190	252	252	206	206	212	218	Zarza Franco 2008; Haplotype discovered in other northern localities by Zarza et al 2008	Zarza Franco 2008
LMR08	Limon de Ramos	Sinaloa	-107.518	24.9088	North A	105_nth	KT003210	95	99	219	221	237	239	226	228	188	190	252	252	206	206	212	218	Zarza Franco 2008; Genebank accesion released in this manuscript	Zarza Franco 2008
LMR09	Limon de Ramos	Sinaloa	-107.515	24.9148	North A	21_nth	EU246714	95	101	219	221	233	237	226	228	186	188	252	252	206	206	212	222	Zarza Franco 2008; Haplotype discovered in other northern localities by Zarza et al 2008	Zarza Franco 2008
SB01	San Blas	Nayarit	-105.285	21.5394	North A	69_nth	EU246761	N/A	N/A	N/A	N/A	N/A	N/A	N/A	N/A	N/A	N/A	N/A	N/A	N/A	N/A	N/A	N/A	Zarza et al 2008	N/A
SB02	San Blas	Nayarit	-105.285	21.5394	North A	70_nth	EU246762	N/A	N/A	N/A	N/A	N/A	N/A	N/A	N/A	N/A	N/A	N/A	N/A	N/A	N/A	N/A	N/A	Zarza et al 2008	N/A
SB03	San Blas	Nayarit	-105.285	21.5394	North A	69_nth	EU246761	N/A	N/A	N/A	N/A	N/A	N/A	N/A	N/A	N/A	N/A	N/A	N/A	N/A	N/A	N/A	N/A	Zarza et al 2008	N/A
SI01	Santiago Ixcuintla	Nayarit	-105.206	21.8111	North A	69_nth	EU246761	N/A	N/A	N/A	N/A	N/A	N/A	N/A	N/A	N/A	N/A	N/A	N/A	N/A	N/A	N/A	N/A	Zarza et al 2008	N/A
SI02	Santiago Ixcuintla	Nayarit	-105.206	21.8111	North A	71_nth	EU246763	N/A	N/A	N/A	N/A	N/A	N/A	N/A	N/A	N/A	N/A	N/A	N/A	N/A	N/A	N/A	N/A	Zarza et al 2008	N/A
SI03	Santiago Ixcuintla	Nayarit	-105.206	21.8111	North A	71_nth	EU246763	N/A	N/A	N/A	N/A	N/A	N/A	N/A	N/A	N/A	N/A	N/A	N/A	N/A	N/A	N/A	N/A	Zarza et al 2008	N/A
SI04	Santiago Ixcuintla	Nayarit	-105.206	21.8111	North A	71_nth	EU246763	N/A	N/A	N/A	N/A	N/A	N/A	N/A	N/A	N/A	N/A	N/A	N/A	N/A	N/A	N/A	N/A	Zarza et al 2008	N/A
SI05	Santiago Ixcuintla	Nayarit	-105.206	21.8111	North A	69_nth	EU246761	N/A	N/A	N/A	N/A	N/A	N/A	N/A	N/A	N/A	N/A	N/A	N/A	N/A	N/A	N/A	N/A	Zarza et al 2008	N/A
SI06	Santiago Ixcuintla	Nayarit	-105.206	21.8111	North A	69_nth	EU246761	N/A	N/A	N/A	N/A	N/A	N/A	N/A	N/A	N/A	N/A	N/A	N/A	N/A	N/A	N/A	N/A	Zarza et al 2008	N/A
SI07	Santiago Ixcuintla	Nayarit	-105.206	21.8111	North A	71_nth	EU246763	N/A	N/A	N/A	N/A	N/A	N/A	N/A	N/A	N/A	N/A	N/A	N/A	N/A	N/A	N/A	N/A	Zarza et al 2008	N/A
SI08	Santiago Ixcuintla	Nayarit	-105.206	21.8111	North A	72_nth	EU246764	N/A	N/A	N/A	N/A	N/A	N/A	N/A	N/A	N/A	N/A	N/A	N/A	N/A	N/A	N/A	N/A	Zarza et al 2008	N/A
SI10	Santiago Ixcuintla	Nayarit	-105.206	21.8111	North A	69_nth	EU246761	N/A	N/A	N/A	N/A	N/A	N/A	N/A	N/A	N/A	N/A	N/A	N/A	N/A	N/A	N/A	N/A	Zarza et al 2008	N/A
SI12	Santiago Ixcuintla	Nayarit	-105.206	21.8111	North A	69_nth	EU246761	N/A	N/A	N/A	N/A	N/A	N/A	N/A	N/A	N/A	N/A	N/A	N/A	N/A	N/A	N/A	N/A	Zarza et al 2008	N/A
VU01	Villa Unión	Sinaloa	-106.215	23.1897	North A	18_nth	EU246711	N/A	N/A	N/A	N/A	N/A	N/A	N/A	N/A	N/A	N/A	N/A	N/A	N/A	N/A	N/A	N/A	Zarza et al 2008	N/A
VU02	Villa Unión	Sinaloa	-106.215	23.1897	North A	85_nth	EU246776	N/A	N/A	N/A	N/A	N/A	N/A	N/A	N/A	N/A	N/A	N/A	N/A	N/A	N/A	N/A	N/A	Zarza et al 2008	N/A
VU03	Villa Unión	Sinaloa	-106.215	23.1897	North A	86_nth	EU246777	N/A	N/A	N/A	N/A	N/A	N/A	N/A	N/A	N/A	N/A	N/A	N/A	N/A	N/A	N/A	N/A	Zarza et al 2008	N/A
VU04	Villa Unión	Sinaloa	-106.215	23.1897	North A	84_nth	EU246775	N/A	N/A	N/A	N/A	N/A	N/A	N/A	N/A	N/A	N/A	N/A	N/A	N/A	N/A	N/A	N/A	Zarza et al 2008	N/A
VU05	Villa Unión	Sinaloa	-106.215	23.1897	North A	18_nth	EU246711	N/A	N/A	N/A	N/A	N/A	N/A	N/A	N/A	N/A	N/A	N/A	N/A	N/A	N/A	N/A	N/A	Zarza et al 2008	N/A
VU06	Villa Unión	Sinaloa	-106.215	23.1897	North A	85_nth	EU246776	N/A	N/A	N/A	N/A	N/A	N/A	N/A	N/A	N/A	N/A	N/A	N/A	N/A	N/A	N/A	N/A	Zarza et al 2008	N/A
VU07	Villa Unión	Sinaloa	-106.215	23.1897	North A	86_nth	EU246777	N/A	N/A	N/A	N/A	N/A	N/A	N/A	N/A	N/A	N/A	N/A	N/A	N/A	N/A	N/A	N/A	Zarza et al 2008	N/A
VU08	Villa Unión	Sinaloa	-106.215	23.1897	North A	87_nth	EU246778	N/A	N/A	N/A	N/A	N/A	N/A	N/A	N/A	N/A	N/A	N/A	N/A	N/A	N/A	N/A	N/A	Zarza et al 2008	N/A
VU09	Villa Unión	Sinaloa	-106.215	23.1897	North A	18_nth	EU246711	N/A	N/A	N/A	N/A	N/A	N/A	N/A	N/A	N/A	N/A	N/A	N/A	N/A	N/A	N/A	N/A	Zarza et al 2008	N/A
VU10	Villa Unión	Sinaloa	-106.215	23.1897	North A	22_nth	EU246715	N/A	N/A	N/A	N/A	N/A	N/A	N/A	N/A	N/A	N/A	N/A	N/A	N/A	N/A	N/A	N/A	Zarza et al 2008	N/A
ZC03	Zacualpan	Nayarit	-105.167	21.2486	North A	89_nth	EU246780	91	102	219	219	222	227	226	226	186	190	252	252	209	209	220	233	Zarza et al 2008	Zarza et al 2011
ZC04	Zacualpan	Nayarit	-105.167	21.2486	North A	89_nth	EU246780	91	95	219	221	218	222	226	226	186	190	252	256	196	209	224	233	Zarza et al 2008	Zarza et al 2011
ZC05	Zacualpan	Nayarit	-105.167	21.2486	North A	69_nth	EU246761	105	105	219	219	222	222	226	226	186	186	252	252	192	196	224	230	Zarza et al 2008	Zarza et al 2011
PV01	Puerto Vallarta	Jalisco	-105.231	20.6133	North B	67_nth	EU246759	99	105	219	219	222	227	226	226	186	186	252	252	196	196	230	230	Zarza et al 2008	Zarza et al 2011
PV02	Puerto Vallarta	Jalisco	-105.231	20.6133	North B	66_nth	EU246758	95	101	219	219	222	241	226	226	186	186	252	254	192	196	216	230	Zarza et al 2011	Zarza et al 2011
PV03	Puerto Vallarta	Jalisco	-105.231	20.6133	North B	67_nth	EU246759	99	103	219	219	229	239	226	226	186	190	252	252	194	213	224	230	Zarza et al 2011	Zarza et al 2011
PV05	Puerto Vallarta	Jalisco	-105.231	20.6133	North B	67_nth	EU246759	95	101	219	219	220	235	226	230	186	186	252	252	194	196	220	230	Zarza et al 2011	Zarza et al 2011
PV07	Puerto Vallarta	Jalisco	-105.231	20.6133	North B	67_nth	EU246759	103	108	219	219	227	239	226	226	186	186	252	252	196	196	224	230	Zarza et al 2011	Zarza et al 2011
PV09	Puerto Vallarta	Jalisco	-105.231	20.6133	North B	67_nth	EU246759	99	101	219	219	229	233	226	226	186	186	248	252	196	196	230	230	Zarza et al 2011	Zarza et al 2011
ZC01	Zacualpan	Nayarit	-105.167	21.2486	North B	88_nth	EU246779	91	99	219	219	227	243	226	226	190	190	252	256	196	196	218	220	Zarza et al 2008	Zarza et al 2011
ZC02	Zacualpan	Nayarit	-105.167	21.2486	North B	88_nth	EU246779	95	95	219	219	222	222	226	228	186	190	252	252	190	194	233	233	Zarza et al 2008	Zarza et al 2011
BIO01	Estación de Biología, Chamela UNAM	Jalisco	-105.044	19.4985	North C	37_nth	EU246730	101	108	219	219	220	224	226	230	189	192	252	254	194	194	226	230	Zarza et al 2011	Zarza et al 2011
BIO02	Estación de Biología, Chamela UNAM	Jalisco	-105.044	19.4985	North C	38_nth	EU246731	97	105	215	219	226	233	224	226	188	189	248	252	192	194	212	230	Zarza et al 2011	Zarza et al 2011
BIO03	Estación de Biología, Chamela UNAM	Jalisco	-105.044	19.4985	North C	H102	FJ715735	97	101	215	219	220	224	226	232	186	186	248	254	190	196	212	233	Zarza et al 2011	Zarza et al 2011
BIO04	Estación de Biología, Chamela UNAM	Jalisco	-105.044	19.4985	North C	37_nth	EU246730	91	101	219	219	220	237	226	226	186	186	-9	-9	194	194	-9	-9	Zarza et al 2011	Zarza et al 2011
BIO05	Estación de Biología, Chamela UNAM	Jalisco	-105.044	19.4985	North C	H103	FJ715736	97	101	212	219	220	229	226	232	186	186	252	263	190	194	212	220	Zarza et al 2011	Zarza et al 2011
FCO01	Francisco Villa	Jalisco	-104.968	19.385	North C	38_nth	EU246731	101	101	219	219	220	231	226	226	186	186	248	254	192	192	222	224	Zarza et al 2011	Zarza et al 2011
For01	La Fortuna	Jalisco	-105.11	19.5972	North C	36_nth	EU246729	99	99	219	219	231	231	226	226	186	186	248	254	194	196	212	224	Zarza et al 2011	Zarza et al 2011
For03	La Fortuna	Jalisco	-105.11	19.5972	North C	37_nth	EU246730	95	97	219	219	220	231	226	230	186	186	252	256	192	194	220	226	Zarza et al 2011	Zarza et al 2011
For04	La Fortuna	Jalisco	-105.11	19.5972	North C	38_nth	EU246731	95	97	215	219	218	233	226	232	189	189	248	250	194	194	230	230	Zarza et al 2011	Zarza et al 2011
For05	La Fortuna	Jalisco	-105.11	19.5972	North C	37_nth	EU246730	99	106	215	215	220	224	226	226	186	186	250	254	192	192	212	212	Zarza et al 2011	Zarza et al 2011
For06	La Fortuna	Jalisco	-105.11	19.5972	North C	39_nth	EU246732	95	110	215	215	233	237	226	226	186	186	252	254	194	196	212	212	Zarza et al 2011	Zarza et al 2011
For07	La Fortuna	Jalisco	-105.11	19.5972	North C	37_nth	EU246730	97	99	219	219	224	231	226	226	189	194	256	256	194	194	212	222	Zarza et al 2011	Zarza et al 2011
For08	La Fortuna	Jalisco	-105.11	19.5972	North C	37_nth	EU246730	101	101	219	219	218	227	226	226	186	186	252	256	194	194	222	233	Zarza et al 2011	Zarza et al 2011
For09	La Fortuna	Jalisco	-105.11	19.5972	North C	37_nth	EU246730	101	101	219	219	235	243	226	232	186	186	254	258	192	196	233	233	Zarza et al 2011	Zarza et al 2011
PCH01	Pueblo de Chamela	Jalisco	-105.073	19.5267	North C	37_nth	EU246730	97	99	219	219	220	233	226	232	186	189	252	263	196	196	212	230	Zarza et al 2011	Zarza et al 2011
PCH02	Pueblo de Chamela	Jalisco	-105.073	19.5267	North C	37_nth	EU246730	101	106	219	219	224	224	226	226	186	186	250	263	196	200	212	220	Zarza et al 2011	Zarza et al 2011
PCH03	Pueblo de Chamela	Jalisco	-105.073	19.5267	North C	37_nth	EU246730	99	101	215	223	220	220	226	232	186	189	248	252	194	196	224	230	Zarza et al 2011	Zarza et al 2011
PCH04	Pueblo de Chamela	Jalisco	-105.073	19.5267	North C	37_nth	EU246730	101	105	219	219	218	231	226	226	189	192	248	256	192	194	212	230	Zarza et al 2011	Zarza et al 2011
PCH05	Pueblo de Chamela	Jalisco	-105.073	19.5267	North C	H103	FJ715736	91	101	219	219	220	224	226	226	189	192	254	263	200	200	212	222	Zarza et al 2011	Zarza et al 2011
PCH06	Pueblo de Chamela	Jalisco	-105.073	19.5267	North C	H102	FJ715735	97	99	215	219	220	229	226	226	186	186	252	252	194	200	212	232	Zarza et al 2011	Zarza et al 2011
PCH07	Pueblo de Chamela	Jalisco	-105.073	19.5267	North C	37_nth	EU246730	91	101	219	219	220	220	226	232	186	189	250	254	190	196	212	230	Zarza et al 2011	Zarza et al 2011
PCH08	Pueblo de Chamela	Jalisco	-105.073	19.5267	North C	37_nth	EU246730	91	105	219	219	220	227	226	226	186	190	252	263	194	194	230	233	Zarza et al 2011	Zarza et al 2011
PV04	Puerto Vallarta	Jalisco	-105.231	20.6133	North C	68_nth	EU246760	97	101	219	219	233	237	226	226	186	188	252	252	192	213	220	230	Zarza et al 2011	Zarza et al 2011
PV08	Puerto Vallarta	Jalisco	-105.231	20.6133	North C	68_nth	EU246760	101	105	219	219	220	229	226	226	186	186	252	254	196	196	220	230	Zarza et al 2011	Zarza et al 2011
PV10	Puerto Vallarta	Jalisco	-105.231	20.6133	North C	68_nth	EU246760	91	103	219	219	233	237	226	226	188	188	252	252	192	192	222	228	Zarza et al 2011	Zarza et al 2011
BN05	Barra de Navidad	Jalisco	-104.674	19.2108	North D	H95	FJ715728	91	101	215	219	220	239	226	232	186	189	252	254	194	196	230	230	Zarza et al 2011	Zarza et al 2011
BN06	Barra de Navidad	Jalisco	-104.674	19.2108	North D	H95	FJ715728	105	106	215	219	220	235	226	226	186	186	254	263	192	196	224	235	Zarza et al 2011	Zarza et al 2011
BN08	Barra de Navidad	Jalisco	-104.675	19.2069	North D	H95	FJ715728	99	106	215	219	220	239	226	232	186	186	246	252	194	194	230	230	Zarza et al 2011	Zarza et al 2011
CYS01	Careyes	Jalisco	-105.031	19.4466	North D	H99	FJ715732	97	101	219	219	220	235	226	226	186	188	250	254	192	194	230	230	Zarza et al 2011	Zarza et al 2011
CYS02	Careyes	Jalisco	-105.031	19.4504	North D	H101	FJ715734	99	106	215	219	224	237	226	226	186	186	254	256	194	194	220	224	Zarza et al 2011	Zarza et al 2011
EZP05	Emiliano Zapata	Jalisco	-104.718	19.2466	North D	H95	FJ715728	97	101	219	219	227	233	226	226	186	189	254	254	194	194	212	212	Zarza et al 2011	Zarza et al 2011
EZP07	Emiliano Zapata	Jalisco	-104.718	19.2466	North D	H97	FJ715730	95	97	215	219	227	237	226	226	186	189	252	252	194	196	224	230	Zarza et al 2011	Zarza et al 2011
EZP08	Emiliano Zapata	Jalisco	-104.718	19.2467	North D	H95	FJ715728	91	105	219	219	235	239	226	226	186	189	252	265	194	196	212	230	Zarza et al 2011	Zarza et al 2011
FCO02	Francisco Villa	Jalisco	-104.968	19.385	North D	H99	FJ715732	97	99	215	219	220	224	226	226	186	188	252	254	194	196	230	233	Zarza et al 2011	Zarza et al 2011
FCO03	Francisco Villa	Jalisco	-104.968	19.385	North D	H97	FJ715730	99	99	219	219	220	239	226	230	189	190	252	263	190	194	212	230	Zarza et al 2011	Zarza et al 2011
FCO04	Francisco Villa	Jalisco	-104.968	19.385	North D	H99	FJ715732	99	99	215	219	226	241	232	234	186	186	254	260	194	194	212	212	Zarza et al 2011	Zarza et al 2011
FCO05	Francisco Villa	Jalisco	-104.968	19.385	North D	H97	FJ715730	99	103	219	219	220	233	226	226	186	186	248	263	194	196	212	212	Zarza et al 2011	Zarza et al 2011
FCO06	Francisco Villa	Jalisco	-104.968	19.385	North D	H98	FJ715731	97	101	219	219	220	224	226	226	186	190	248	263	190	194	212	233	Zarza et al 2011	Zarza et al 2011
FCO07	Francisco Villa	Jalisco	-104.968	19.385	North D	H97	FJ715730	97	108	219	219	237	239	226	226	186	189	248	265	194	194	212	224	Zarza et al 2011	Zarza et al 2011
FCO08	Francisco Villa	Jalisco	-104.968	19.385	North D	H99	FJ715732	103	108	219	227	220	224	230	232	186	186	260	263	192	194	222	224	Zarza et al 2011	Zarza et al 2011
FCO09	Francisco Villa	Jalisco	-104.968	19.385	North D	H99	FJ715732	99	101	219	219	220	241	226	230	186	186	248	252	190	194	212	222	Zarza et al 2011	Zarza et al 2011
FCO10	Francisco Villa	Jalisco	-104.968	19.385	North D	H97	FJ715730	91	97	219	219	224	231	224	230	186	186	246	265	192	192	212	233	Zarza et al 2011	Zarza et al 2011
FCO12	Francisco Villa	Jalisco	-104.968	19.385	North D	H101	FJ715734	99	108	219	219	220	220	226	232	186	188	254	265	192	194	220	230	Zarza et al 2011	Zarza et al 2011
FCO13	Francisco Villa	Jalisco	-104.968	19.385	North D	H97	FJ715730	99	108	215	219	224	227	232	232	186	186	252	254	194	194	212	224	Zarza et al 2011	Zarza et al 2011
FCO14	Francisco Villa	Jalisco	-104.968	19.385	North D	H101	FJ715734	99	110	215	215	220	231	226	232	186	192	252	265	190	194	212	233	Zarza et al 2011	Zarza et al 2011
FCO15	Francisco Villa	Jalisco	-104.968	19.385	North D	H100	FJ715733	99	101	215	219	224	241	226	232	186	186	250	254	192	194	212	233	Zarza et al 2011	Zarza et al 2011
MAZ02	La Manzanilla	Jalisco	-104.785	19.2891	North D	H97	FJ715730	101	108	215	219	220	239	226	232	186	186	250	254	192	194	222	230	Zarza et al 2011	Zarza et al 2011
MAZ03	La Manzanilla	Jalisco	-104.784	19.2925	North D	H99	FJ715732	99	101	219	219	222	231	226	232	186	186	248	250	194	194	224	230	Zarza et al 2011	Zarza et al 2011
MAZ08	La Manzanilla	Jalisco	-104.786	19.2856	North D	H101	FJ715734	91	93	219	219	220	220	226	232	186	189	252	254	194	194	230	230	Zarza et al 2011	Zarza et al 2011
TNT01	Tenacatita	Jalisco	-104.883	19.3025	North D	H97	FJ715730	91	106	219	219	220	233	226	230	186	186	254	265	192	192	230	230	Zarza et al 2011	Zarza et al 2011
TNT02	Tenacatita	Jalisco	-104.884	19.3061	North D	H97	FJ715730	93	99	215	219	220	233	226	230	186	189	250	256	190	192	224	230	Zarza et al 2011	Zarza et al 2011
TNT03	Tenacatita	Jalisco	-104.886	19.3092	North D	H101	FJ715734	99	101	215	219	224	224	226	226	189	189	248	254	194	200	212	224	Zarza et al 2011	Zarza et al 2011
TNT04	Tenacatita	Jalisco	-104.885	19.305	North D	H96	FJ715729	99	101	215	219	220	233	226	226	186	189	252	263	194	200	212	233	Zarza et al 2011	Zarza et al 2011
TNT05	Tenacatita	Jalisco	-104.886	19.3085	North D	H101	FJ715734	101	101	219	219	220	-9	226	226	186	194	250	254	194	206	212	230	Zarza et al 2011	Zarza et al 2011
TNT06	Tenacatita	Jalisco	-104.885	19.3063	North D	H101	FJ715734	103	103	219	219	235	241	226	226	186	186	250	263	192	196	212	230	Zarza et al 2011	Zarza et al 2011
TNT07	Tenacatita	Jalisco	-104.885	19.3063	North D	H97	FJ715730	99	101	219	219	220	231	226	226	186	186	250	256	190	196	222	224	Zarza et al 2011	Zarza et al 2011
TNT08	Tenacatita	Jalisco	-104.882	19.2962	North D	H97	FJ715730	99	103	219	219	220	226	226	226	186	189	250	254	192	192	230	230	Zarza et al 2011	Zarza et al 2011
LL01	San Juan de los Llanos	Oaxaca	-98.5014	16.6558	Oaxaca	49_oax	EU246741	93	105	219	219	216	235	222	222	189	189	248	252	198	198	230	230	Zarza et al 2008	Zarza et al 2016
LL02	San Juan de los Llanos	Oaxaca	-98.5014	16.6558	Oaxaca	50_oax	EU246742	97	108	215	219	212	239	222	222	186	189	250	250	194	194	230	233	Zarza et al 2008	Zarza et al 2016
BP01	La Barra del Potrero	Oaxaca	-96.7625	15.7342	South	14_sth	EU246707	99	99	219	219	212	218	222	222	189	189	246	250	-9	-9	230	235	Zarza et al 2008	Faria 2008; Zarza et al 2016
BP03	La Barra del Potrero	Oaxaca	-96.7625	15.7342	South	14_sth	EU246707	93	99	219	219	220	220	222	222	186	189	252	261	-9	-9	233	233	Zarza et al 2008	Faria 2008; Zarza et al 2016
BP05	La Barra del Potrero	Oaxaca	-96.7625	15.7342	South	14_sth	EU246707	99	99	215	215	212	218	222	222	186	189	250	250	-9	-9	233	239	Zarza et al 2008	Faria 2008; Zarza et al 2016
BP06	La Barra del Potrero	Oaxaca	-96.7625	15.7342	South	14_sth	EU246707	99	99	215	215	218	220	222	222	186	186	248	254	-9	-9	218	218	Zarza et al 2008	Faria 2008; Zarza et al 2016
BP08	La Barra del Potrero	Oaxaca	-96.7625	15.7342	South	14_sth	EU246707	99	108	219	219	212	214	222	222	186	189	246	254	-9	-9	218	218	Zarza et al 2008	Faria 2008; Zarza et al 2016
BP09	La Barra del Potrero	Oaxaca	-96.7625	15.7342	South	14_sth	EU246707	99	99	215	215	212	214	222	222	189	189	250	250	-9	-9	233	233	Zarza et al 2008	Faria 2008; Zarza et al 2016
BP10	La Barra del Potrero	Oaxaca	-96.7625	15.7342	South	15_sth	EU246708	91	93	215	215	220	220	222	222	182	189	246	248	-9	-9	239	239	Zarza et al 2008	Faria 2008; Zarza et al 2016
BP11	La Barra del Potrero	Oaxaca	-96.7625	15.7342	South	14_sth	EU246707	91	91	219	223	214	218	222	222	186	189	258	261	-9	-9	230	239	Zarza et al 2008	Faria 2008; Zarza et al 2016
CP01	Copalita	Oaxaca	-96.1881	15.8931	South	23_sth	EU246716	93	99	219	219	212	218	222	222	186	188	250	256	-9	-9	230	230	Zarza et al 2008	Faria 2008; Zarza et al 2016
CP02	Copalita	Oaxaca	-96.1881	15.8931	South	23_sth	EU246716	99	99	215	215	212	214	222	222	189	189	246	248	-9	-9	218	230	Zarza et al 2008	Faria 2008; Zarza et al 2016
CP03	Copalita	Oaxaca	-96.1881	15.8931	South	24_sth	EU246717	99	99	215	219	214	218	220	222	189	189	248	256	-9	-9	218	233	Zarza et al 2008	Faria 2008; Zarza et al 2016
CP04	Copalita	Oaxaca	-96.1881	15.8931	South	14_sth	EU246707	93	108	215	219	212	214	222	222	186	188	246	248	-9	-9	230	230	Zarza et al 2008	Faria 2008; Zarza et al 2016
IX01	Ixhuatan	Oaxaca	-94.4825	16.3508	South	14_sth	EU246707	105	108	219	219	212	218	222	222	182	189	246	250	-9	-9	214	233	Zarza et al 2008	Faria 2008; Zarza et al 2016
IX02	Ixhuatan	Oaxaca	-94.4825	16.3508	South	14_sth	EU246707	101	101	219	219	214	214	222	222	182	182	248	250	-9	-9	218	230	Zarza et al 2008	Faria 2008; Zarza et al 2016
IX03	Ixhuatan	Oaxaca	-94.4825	16.3508	South	14_sth	EU246707	105	108	219	223	214	214	222	222	182	182	250	250	-9	-9	230	233	Zarza et al 2008	Faria 2008; Zarza et al 2016
IX04	Ixhuatan	Oaxaca	-94.4825	16.3508	South	14_sth	EU246707	89	105	219	223	212	218	222	222	182	189	248	250	-9	-9	214	230	Zarza et al 2008	Faria 2008; Zarza et al 2016
IX05	Ixhuatan	Oaxaca	-94.4825	16.3508	South	43_sth	EU246735	101	105	219	219	212	214	222	222	182	182	248	250	-9	-9	218	230	Zarza et al 2008	Faria 2008; Zarza et al 2016
IX06	Ixhuatan	Oaxaca	-94.4825	16.3508	South	14_sth	EU246707	101	110	219	223	218	222	222	222	186	188	248	250	-9	-9	230	233	Zarza et al 2008	Faria 2008; Zarza et al 2016
IX07	Ixhuatan	Oaxaca	-94.4825	16.3508	South	14_sth	EU246707	95	106	219	223	210	224	222	222	182	186	250	258	-9	-9	218	218	Zarza et al 2008	Faria 2008; Zarza et al 2016
IX09	Ixhuatan	Oaxaca	-94.4825	16.3508	South	14_sth	EU246707	95	95	219	223	214	214	222	222	182	189	248	250	-9	-9	214	233	Zarza et al 2008	Faria 2008; Zarza et al 2016
IX12	Ixhuatan	Oaxaca	-94.4825	16.3508	South	14_sth	EU246707	95	105	215	219	220	220	222	222	182	189	250	250	-9	-9	218	230	Zarza et al 2008	Faria 2008; Zarza et al 2016
IXII	Ixhuatan	Oaxaca	-94.4825	16.3508	South	44_sth	EU246736	101	101	219	219	218	218	222	222	182	182	250	258	-9	-9	230	230	Zarza et al 2008	Faria 2008; Zarza et al 2016
JM01	Jalapa del Marquez	Oaxaca	-95.4536	16.4406	South	47_sth	EU246739	95	110	219	219	218	218	222	224	186	188	250	256	-9	-9	218	230	Zarza et al 2008	Faria 2008; Zarza et al 2016
JM02	Jalapa del Marquez	Oaxaca	-95.4536	16.4406	South	48_sth	EU246740	95	108	219	219	212	222	222	222	182	188	250	250	-9	-9	230	233	Zarza et al 2008	Faria 2008; Zarza et al 2016
JM03	Jalapa del Marquez	Oaxaca	-95.4536	16.4406	South	47_sth	EU246739	105	106	219	219	212	214	222	222	188	188	250	250	-9	-9	230	230	Zarza et al 2008	Faria 2008; Zarza et al 2016
NZ01	Nizanda	Oaxaca	-95.0153	16.6528	South	54_sth	EU246746	95	116	219	223	212	214	222	222	182	186	250	250	-9	-9	218	230	Zarza et al 2008	Faria et al 2010
NZ07	Nizanda	Oaxaca	-95.0153	16.6528	South	55_sth	EU246747	95	101	219	219	220	222	222	222	186	189	250	250	-9	-9	230	230	Zarza et al 2008	Faria et al 2010
NZ09	Nizanda	Oaxaca	-95.0153	16.6528	South	55_sth	EU246747	101	101	219	227	220	220	222	222	188	189	250	258	-9	-9	218	233	Zarza et al 2008	Faria et al 2010
NZ10	Nizanda	Oaxaca	-95.0153	16.6528	South	55_sth	EU246747	-9	-9	219	219	218	218	222	222	186	189	240	258	-9	-9	218	230	Zarza et al 2008	Faria et al 2010
NZ15	Nizanda	Oaxaca	-95.0153	16.6528	South	57_sth	EU246749	103	110	223	227	218	218	222	222	186	189	250	250	-9	-9	218	230	Zarza et al 2008	Faria et al 2010
NZ18	Nizanda	Oaxaca	-95.0153	16.6528	South	56_sth	EU246748	91	103	219	219	214	214	222	222	186	189	250	258	-9	-9	230	233	Zarza et al 2008	Faria et al 2010
NZ21	Nizanda	Oaxaca	-95.0153	16.6528	South	57_sth	EU246749	105	106	219	219	220	220	222	222	186	186	240	250	-9	-9	230	230	Zarza et al 2008	Faria et al 2010
NZ27	Nizanda	Oaxaca	-95.0153	16.6528	South	57_sth	EU246749	95	101	219	219	212	214	222	222	186	189	258	258	-9	-9	230	230	Zarza et al 2008	Faria et al 2010
NZ31	Nizanda	Oaxaca	-95.0153	16.6528	South	55_sth	EU246747	99	101	219	223	214	220	222	222	186	188	250	254	-9	-9	230	233	Zarza et al 2008	Faria et al 2010
PH01	San Pedro Huamelula	Oaxaca	-95.6653	16.025	South	14_sth	EU246707	95	103	219	219	218	218	222	222	189	189	246	256	-9	-9	233	233	Zarza et al 2008	Faria 2008; Zarza et al 2016
PH02	San Pedro Huamelula	Oaxaca	-95.6653	16.025	South	60_sth	EU246752	95	106	215	219	218	220	222	222	188	189	246	258	-9	-9	230	233	Zarza et al 2008	Faria 2008; Zarza et al 2016
PH03	San Pedro Huamelula	Oaxaca	-95.6653	16.025	South	60_sth	EU246752	95	97	219	219	218	218	222	222	188	188	246	260	-9	-9	228	233	Zarza et al 2008	Faria 2008; Zarza et al 2016
PH05	San Pedro Huamelula	Oaxaca	-95.6653	16.025	South	61_sth	EU246753	97	99	215	219	218	218	222	222	182	188	248	248	-9	-9	230	233	Zarza et al 2008	Faria 2008; Zarza et al 2016
PH06	San Pedro Huamelula	Oaxaca	-95.6653	16.025	South	61_sth	EU246753	99	101	219	219	214	218	220	222	189	189	246	256	-9	-9	230	233	Zarza et al 2008	Faria 2008; Zarza et al 2016
PH07	San Pedro Huamelula	Oaxaca	-95.6653	16.025	South	60_sth	EU246752	99	103	219	219	214	220	222	222	189	189	242	256	-9	-9	230	233	Zarza et al 2008	Faria 2008; Zarza et al 2016
PH08	San Pedro Huamelula	Oaxaca	-95.6653	16.025	South	61_sth	EU246753	99	99	219	219	218	218	222	222	189	189	246	258	-9	-9	228	233	Zarza et al 2008	Faria 2008; Zarza et al 2016
PH09	San Pedro Huamelula	Oaxaca	-95.6653	16.025	South	60_sth	EU246752	99	99	219	219	218	218	222	222	182	186	258	258	-9	-9	228	233	Zarza et al 2008	Faria 2008; Zarza et al 2016
PH10	San Pedro Huamelula	Oaxaca	-95.6653	16.025	South	61_sth	EU246753	99	99	215	219	218	218	220	222	186	189	246	246	-9	-9	233	233	Zarza et al 2008	Faria 2008; Zarza et al 2016
CT01	Cuicatlan	Oaxaca	-96.9597	17.7936	South/C_acanthura	25_aca	EU246718	91	91	223	223	237	239	224	228	182	182	250	250	-9	-9	212	212	Zarza et al 2008	Faria 2008; Zarza et al 2016
CT03	Cuicatlan	Oaxaca	-96.9597	17.7936	South/C_acanthura	25_aca	EU246718	91	91	223	223	237	237	224	228	182	182	250	250	-9	-9	212	212	Zarza et al 2008	Faria 2008; Zarza et al 2016
CT04	Cuicatlan	Oaxaca	-96.9597	17.7936	South/C_acanthura	25_aca	EU246718	91	91	223	223	237	239	222	224	182	182	250	250	-9	-9	212	212	Zarza et al 2008	Faria 2008; Zarza et al 2016
CT05	Cuicatlan	Oaxaca	-96.9597	17.7936	South/C_acanthura	25_aca	EU246718	91	91	223	223	237	243	222	224	182	182	250	261	-9	-9	212	212	Zarza et al 2008	Faria 2008; Zarza et al 2016
CT06	Cuicatlan	Oaxaca	-96.9597	17.7936	South/C_acanthura	25_aca	EU246718	91	91	223	223	237	239	222	224	182	182	250	250	-9	-9	212	212	Zarza et al 2008	Faria 2008; Zarza et al 2016
CT07	Cuicatlan	Oaxaca	-96.9597	17.7936	South/C_acanthura	25_aca	EU246718	91	91	223	223	237	237	224	228	182	182	250	250	-9	-9	212	212	Zarza et al 2008	Faria 2008; Zarza et al 2016
CT08	Cuicatlan	Oaxaca	-96.9597	17.7936	South/C_acanthura	25_aca	EU246718	91	91	223	223	237	239	224	224	182	189	250	261	-9	-9	212	212	Zarza et al 2008	Faria 2008; Zarza et al 2016
CT09	Cuicatlan	Oaxaca	-96.9597	17.7936	South/C_acanthura	25_aca	EU246718	91	91	223	223	239	243	224	228	182	182	250	250	-9	-9	212	212	Zarza et al 2008	Faria 2008; Zarza et al 2016
Hgo	Huejutla de Reyes	Hidalgo	-98.42	21.1403	South/C_acanthura	41_aca	EU246733	99	99	227	227	231	241	222	222	182	182	250	250	-9	-9	212	212	Zarza et al 2008	Faria 2008; Zarza et al 2016
LT01	San Andres Tuxtla	Veracruz	-95.2122	18.4497	South/C_acanthura	25_aca	EU246718	91	99	227	227	231	231	222	224	182	182	250	261	-9	-9	212	212	Zarza et al 2008	Faria 2008; Zarza et al 2016
LT04	San Andres Tuxtla	Veracruz	-95.2122	18.4497	South/C_acanthura	25_aca	EU246718	99	99	227	230	231	231	222	222	182	182	261	261	-9	-9	212	212	Zarza et al 2008	Faria 2008; Zarza et al 2016
LT05	San Andres Tuxtla	Veracruz	-95.2122	18.4497	South/C_acanthura	25_aca	EU246718	97	97	223	223	231	241	222	222	182	182	250	261	-9	-9	212	212	Zarza et al 2008	Faria 2008; Zarza et al 2016
Z01	Zapotitlan Salinas	Puebla	-97.4722	18.3286	South/C_acanthura	25_aca	EU246718	91	101	219	219	227	231	224	224	189	189	250	250	-9	-9	228	230	Zarza et al 2008	Faria 2008; Zarza et al 2016
Z02	Zapotitlan Salinas	Puebla	-97.4722	18.3286	South/C_acanthura	25_aca	EU246718	91	99	215	219	212	231	226	228	189	189	250	250	-9	-9	212	212	Zarza et al 2008	Faria 2008; Zarza et al 2016
Z03	Zapotitlan Salinas	Puebla	-97.4722	18.3286	South/C_acanthura	25_aca	EU246718	91	91	215	219	231	231	226	226	189	189	250	250	-9	-9	230	239	Zarza et al 2008	Faria 2008; Zarza et al 2016
Z04	Zapotitlan Salinas	Puebla	-97.4722	18.3286	South/C_acanthura	25_aca	EU246718	91	91	215	223	237	239	234	234	180	189	248	250	-9	-9	228	228	Zarza et al 2008	Faria 2008; Zarza et al 2016
References coded as in the main text
[19]	Zarza E, Reynoso VH, Emerson BC. Diversification in the northern neotropics: mitochondrial and nuclear DNA phylogeography of the iguana Ctenosaura pectinata and related species. Molecular Ecology. 2008;17: 3259–3275. doi:10.1111/j.1365-294X.2008.03826.x
[20]	Zarza Franco GE. Phylogeography and genetic analysis of secondary contact zones of Ctenosaura pectinata and related species. Ph.D. dissertation, Univeristy of East Anglia. 2008.
[21]	Zarza E, Reynoso VH, Emerson BC. Discordant patterns of geographic variation between mitochondrial and microsatellite markers in the Mexican black iguana (Ctenosaura pectinata) in a contact zone. Journal of Biogeography. 2011;38: 1394–1405. doi:10.1111/j.1365-2699.2011.02485.x
[34]	Faria CMA, Zarza E, Reynoso VH, Emerson BC. Predominance of single paternity in the black spiny-tailed iguana: conservation genetic concerns for female-biased hunting. Conserv Genet. 2010;11: 1645–1652. doi:10.1007/s10592-010-0047-2
[38]	Zarza E, Reynoso VH, Emerson BC. Genetic tools for assisting sustainable management and conservation of the spiny-tailed iguana, Ctenosaura pectinata. Herpetology Conservation and Biology. 2016; 11 (Monograph 6): 255-264
[39]	Faria C. Conservation genetics of the Black Iguana - testing for multiple paternity and assessing the use of microsatellites for forensic genetics. Univeristy of East Anglia,. 2008

## Sheet: Summ_Prev_Research
S1. Table 2. Summary of previous research outcomes
Publication	Data employed	Results and main conclusions
Zarza et al 2008	One mtDNA fragment (ND4) and one nuclear marker (alpha enolase); 45 C.pectinata; 2 C.hemilopha; 4 C.acanthura;1 C.similis	Phylogenetic trees for mtDNA data; haplotype networks for mtDNA and nuclear data. Uncovering of highly diverged mtDNA clades within C. pectinata, their relationships and divergence time. Nuclear haplotype network broadly supporting mtDNA geographic patterns.
Zarza Franco 2008; (chapter 3 in PhD thesis)	mtDNA fragment (ND4); 9 microsatellite markers; 15 localities in northwest Mexico in the distribution limits of C. pectinata and C. hemilopha	Narrow hybrid zone between the two species. Steep mtDNA and microsatellite clines, but significantly different from each other. Linkage disequilibrium between some pairs of loci. No signs of assortative mating.
Faria 2008 (chapter 2 in MSc thesis)	10 microsatellites; 10 localities within the South mtDNA lineage	High levels of genetic differentiation among southern Mexico localities, indicating that gene flow may be restricted, local adaptations may occur, thus local extinctions may not be easily replaced.
Faria et al 2010	10 microsatellites; 9 litters from 1 population in southeast Mexico	Paternity test suggesting predominance of single paternity in C. pectinata
Zarza et al 2011	One mtDNA fragment (ND4) and 11 nuclear microsatellites; 17 localities in west Mexico.	Contact zone in west Mexico. Discordance in the distribution of microsatellites and mtDNA in C. pectinata.
Zarza et al (accepted)	mtDNA fragment (ND4); 12 microsatellite loci; 49 localities of C. pectinata and C. acanthura (wild individuals); 2 zoos (captive individuals)	Database of mtDNA and microsatellite data. Assignment of captive individuals of unknown origin to their potential geographic region of origin, applying Bayesian methods (Structure, BAPS).
Zarza et al, this manuscript	mtDNA fragment (ND4); 8 microsatellite loci; 49 localities of C. pectinata and C. acanthura	Applying clustering methods (SAMOVA and STRUCTURE) we demonstrate the existence of five genotypic clusters. Contact zones between genotypic clusters with signatures of interbreeding were detected. We classified hybrid individuals with Newhybrids. There are different levels of geographic discordance between genotypic clusters and mtDNA lineages. We propose the resurrection of C. brachylopha
